# Supplementary material for: Spatiotemporal denudation rates of the Swabian Alb escarpment (Southwest Germany) dominated by base-level lowering and lithology
Source: Copernicus journal article supplement (doi:10.5194/egusphere-2024-2729), 2024-09-20
Supplement: Supplementary file 1 [file egusphere-2024-2729-supplement.pdf]

Supplemental material for:

## **Spatiotemporal denudation rates of the Swabian Alb escarpment (Southwest Germany) dominated by base-level lowering and lithology**

Mirjam Schaller<sup>1,2</sup>, Daniel Peifer<sup>1</sup>, Alexander B. Neely<sup>1</sup>, Thomas Bernard<sup>1</sup>, Christoph Glotzbach<sup>1</sup>, Alexander R. Beer<sup>1</sup>, Todd A. Ehlers<sup>2</sup>

<sup>1</sup>Department of Geosciences, University of Tuebingen, 72076 Tuebingen, Germany

<sup>2</sup>School of Geographical and Earth Sciences, University of Glasgow, Glasgow, United Kingdom

*Correspondence to:* Mirjam Schaller ([mirjam.schaller@glasgow.ac.uk](mailto:mirjam.schaller@glasgow.ac.uk))

## Figures

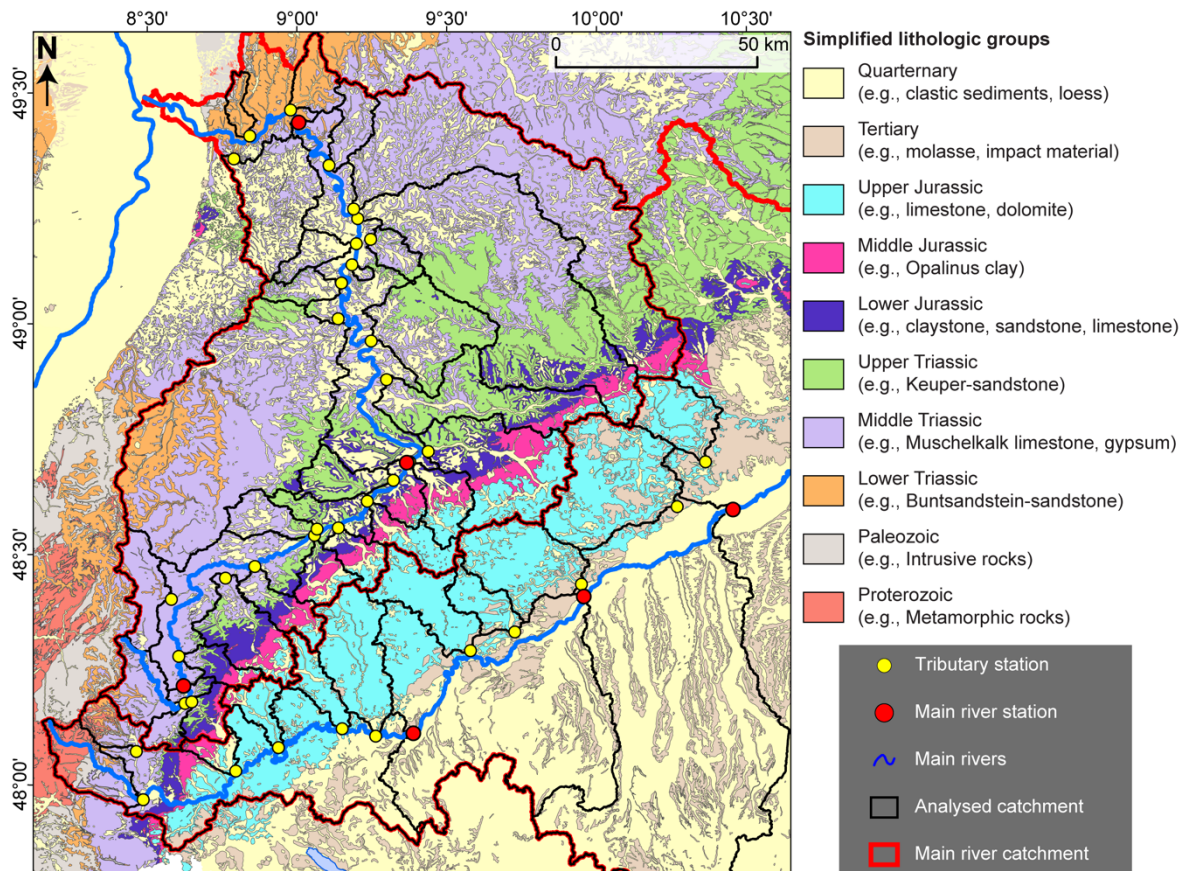

**Figure S1** Simplified lithologic map for the investigated catchments around the Swabian Alb escarpment (based on map from Bundesanstalt für Geowissenschaften und Rohstoffe. Geologische Übersichtskarte der Bundesrepublik Deutschland 1:250 000 (GÜK250, WMS), 2019). The points give locations of measurement stations providing data to calculate physical erosion and chemical weathering rates.

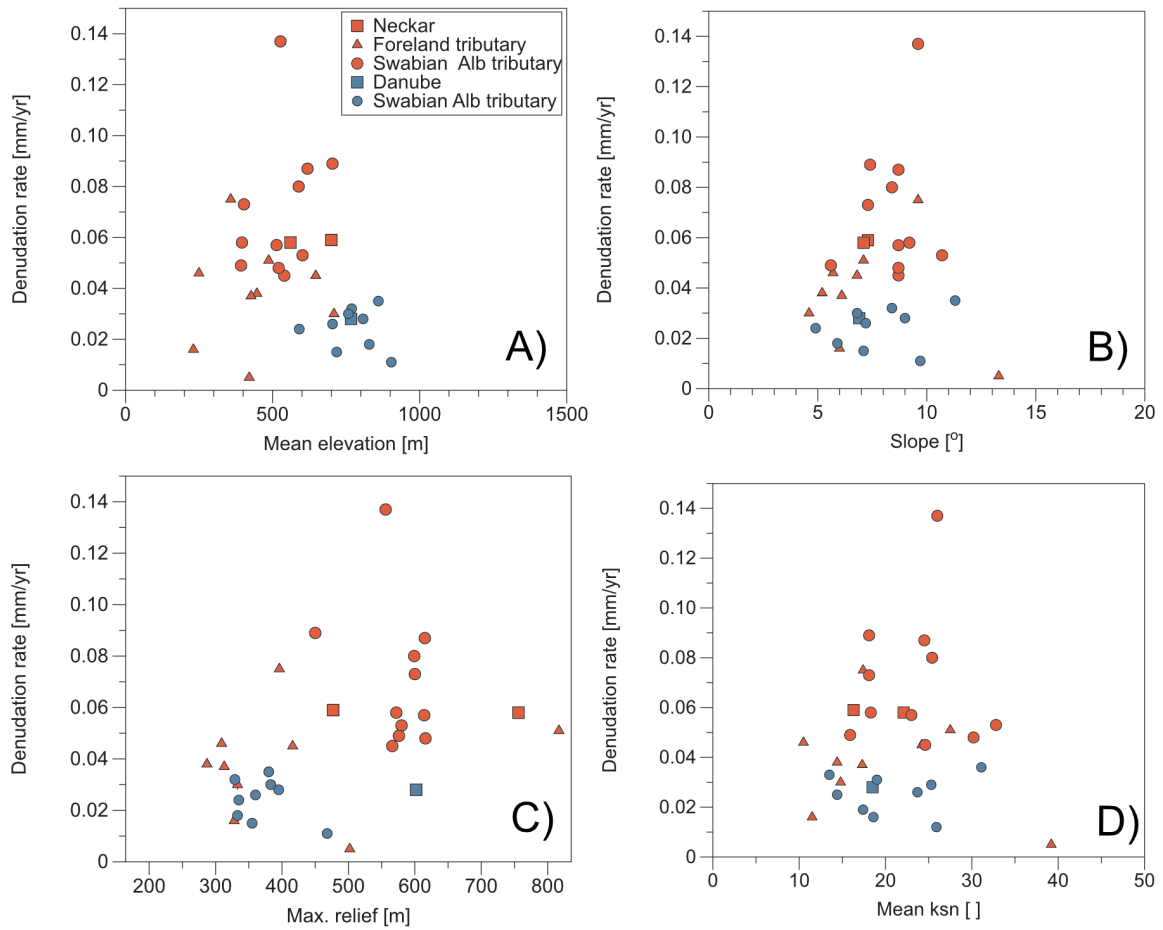

**Figure S2: Decadal-scale total denudation rates versus topographic metrics; A) Mean elevation of drainage basin; B) Maximum relief; C) Mean slope; and D) Mean  $k_{sn}$ .**

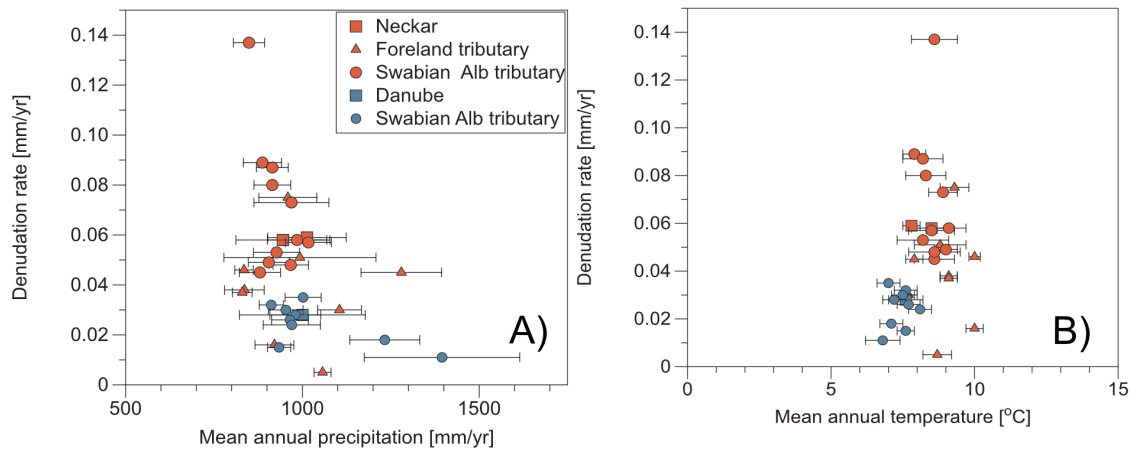

**Figure S3: Decadal-scale total denudation rates versus climatic metrics: A) Mean annual precipitation; and B) Mean annual temperature.**

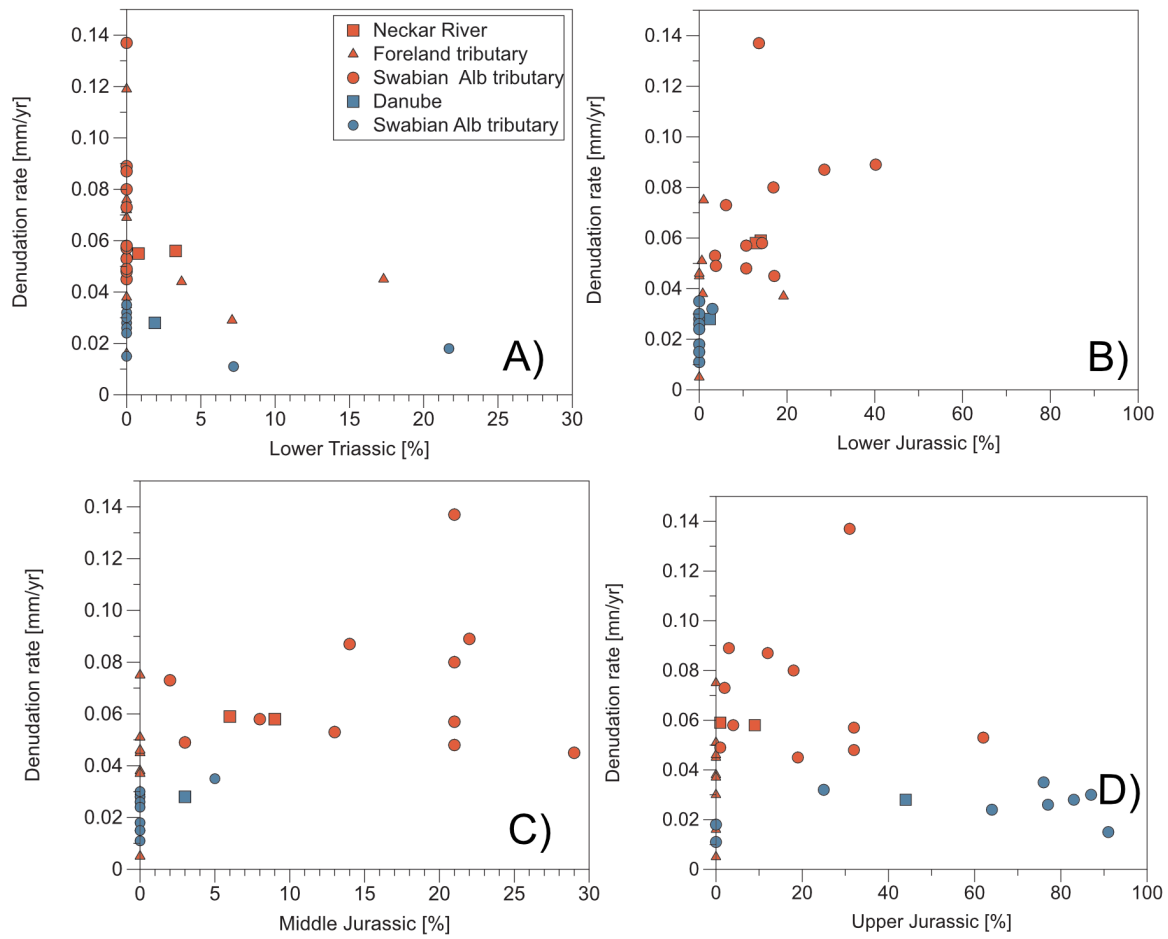

**Figure S4: Decadal-scale total denudation rates versus percent exposure of two selected lithologies: A) Lower Trias; B) Lower Jura; C) Middle Jura; and D) Upper Jura.**

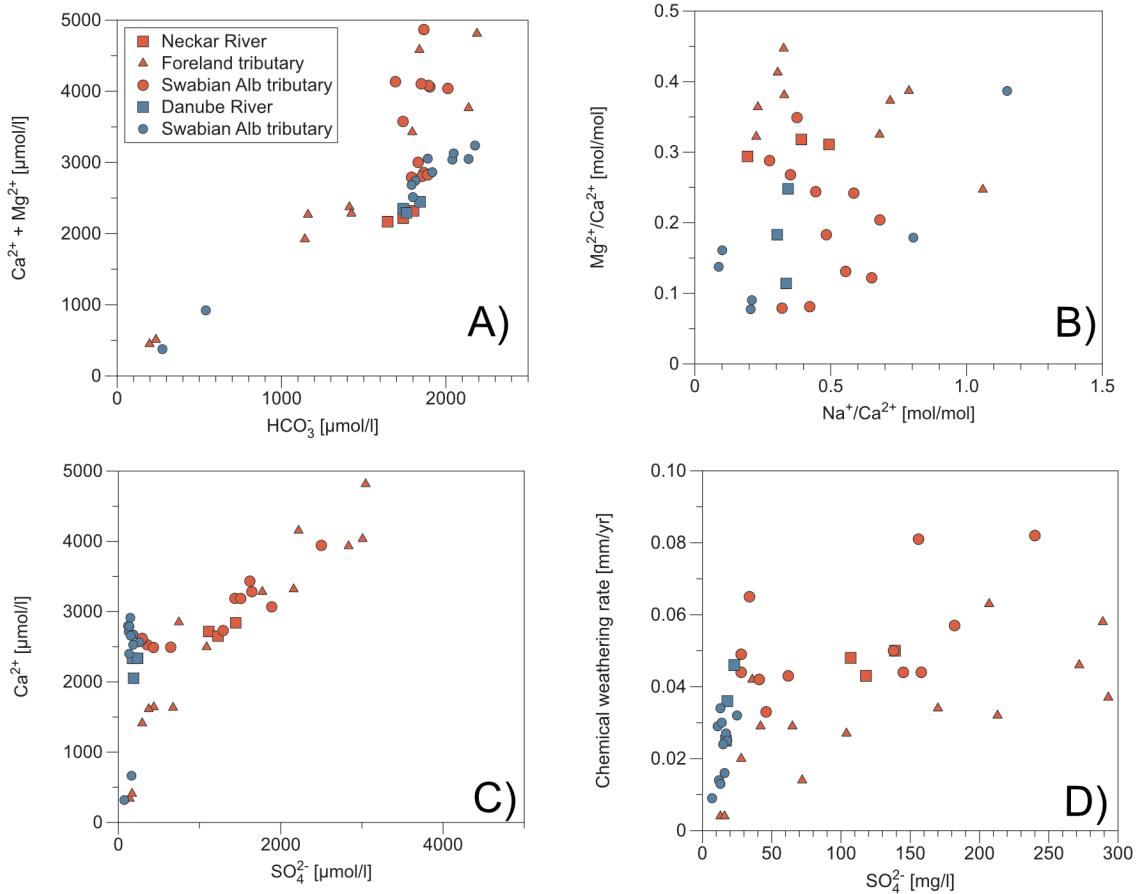

**Figure S5: Plots for different chemical parameters: A)  $\text{Ca}^{2+}$  plus  $\text{Mg}^{2+}$  versus  $\text{HCO}_3^-$ ; B)  $\text{Mg}^{2+}/\text{Ca}^{2+}$  versus  $\text{Na}^+/\text{Ca}^{2+}$ ; C)  $\text{Ca}^{2+}$  versus  $\text{SO}_4^{2-}$ ; D) Chemical weathering rate over  $\text{SO}_4^{2-}$ .**

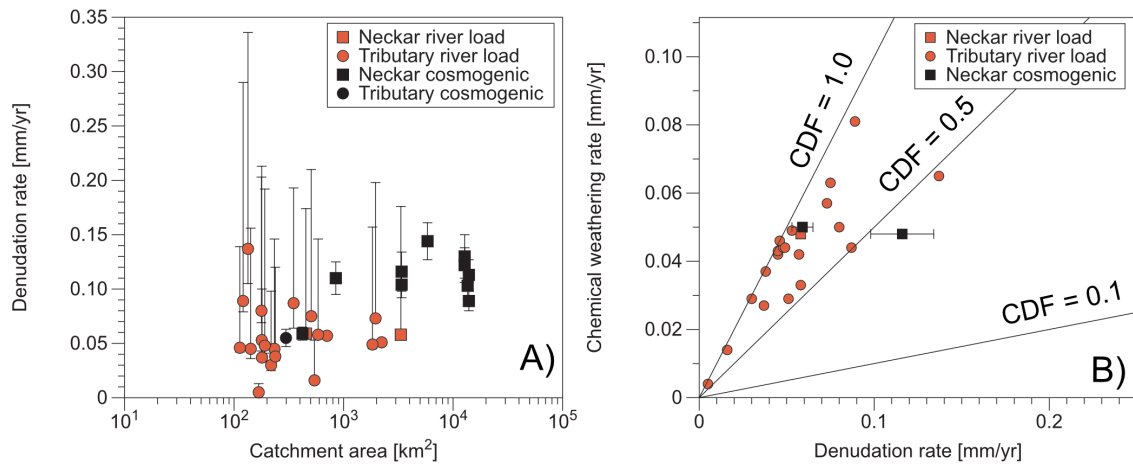

**Figure S6: Total denudation rate based on river load (red circles, this study) compared to cosmogenic nuclide-derived denudation rates from in situ-produced <sup>10</sup>Be in quartz (Schaller et al., 2001 and 2002; black squares). A) Denudation rate versus catchment area. B) Chemical weathering rate versus total denudation rates based on river load and the combination of river load and cosmogenic nuclide-derived rates. Lines indicate different chemical depletion fractions, CDF.**
